# Supplementary material for: Targeted Theranostic Nanoparticles for Brain Tumor Treatment
Source: MDPI journal article supplement (doi:10.3390/pharmaceutics10040181), 2018-10-09

# Supplementary Materials: Targeted Theranostic Nanoparticles for Brain Tumor Treatment

Maria Mendes, João José Sousa, Alberto Pais and Carla Vitorino

Scheme A1. Opportunities and challenges in the optimization of theranostic NPs as a multivariable, multi-objective approach.

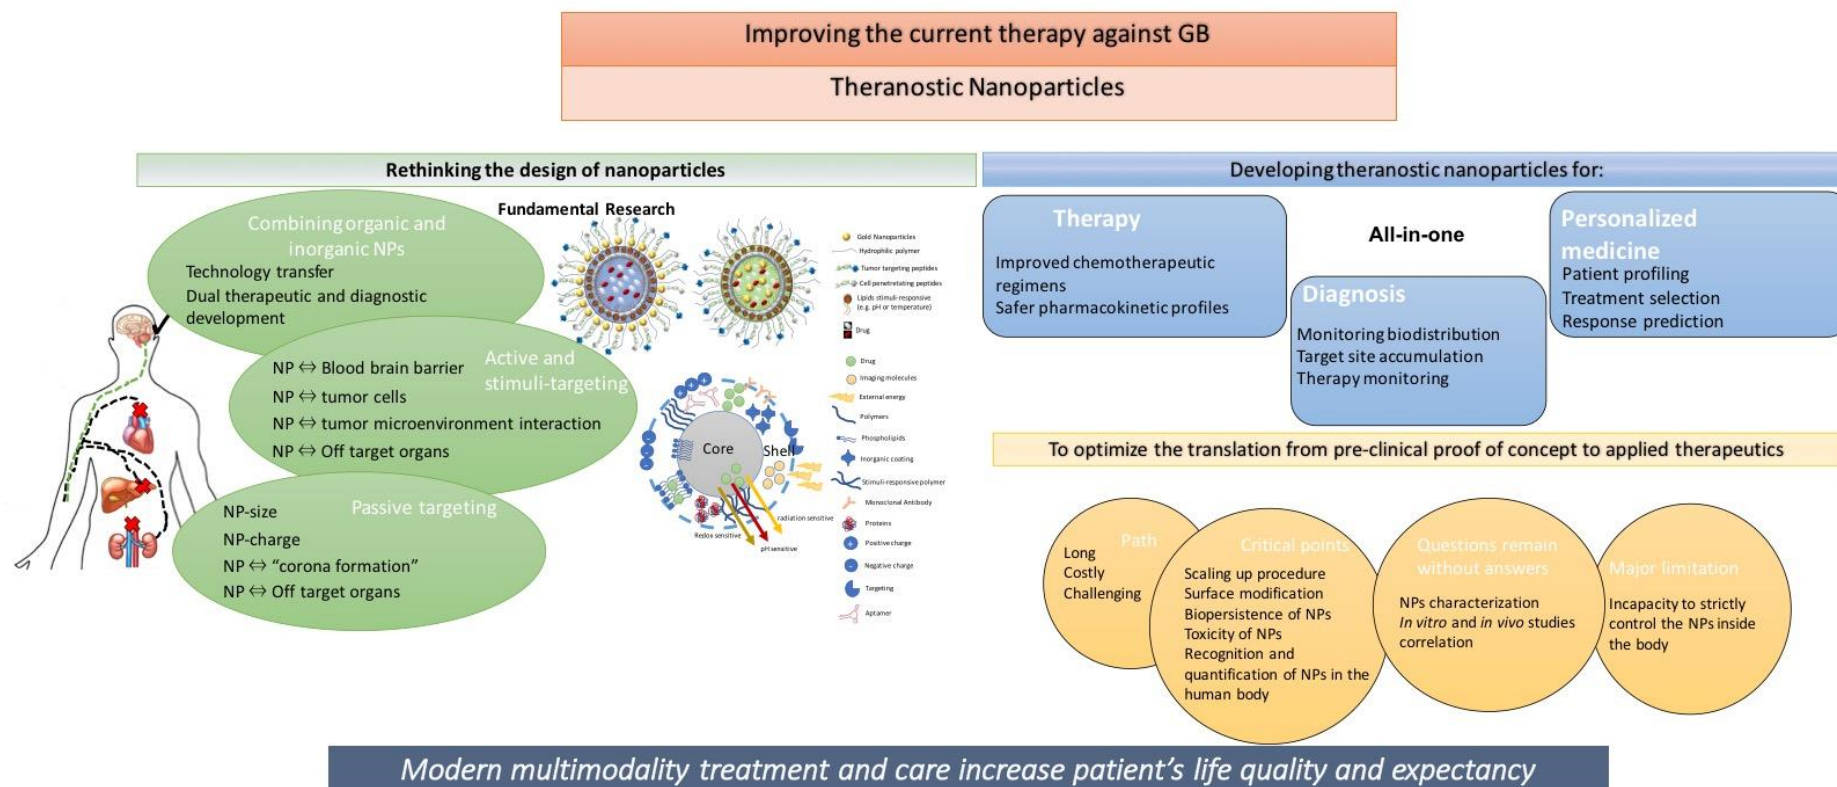

Supplement: s1 [file s1]
